# Supplementary material for: Crisis of Japanese Vascular Flora Shown By Quantifying Extinction Risks for 1618 Taxa
Source: PubMed Central journal article supplement (PMC4055661; doi:10.1371/journal.pone.0098954), 2014-06-12
Supplement: pone.0098954.s001.pdf [file pone.0098954.s001.pdf]

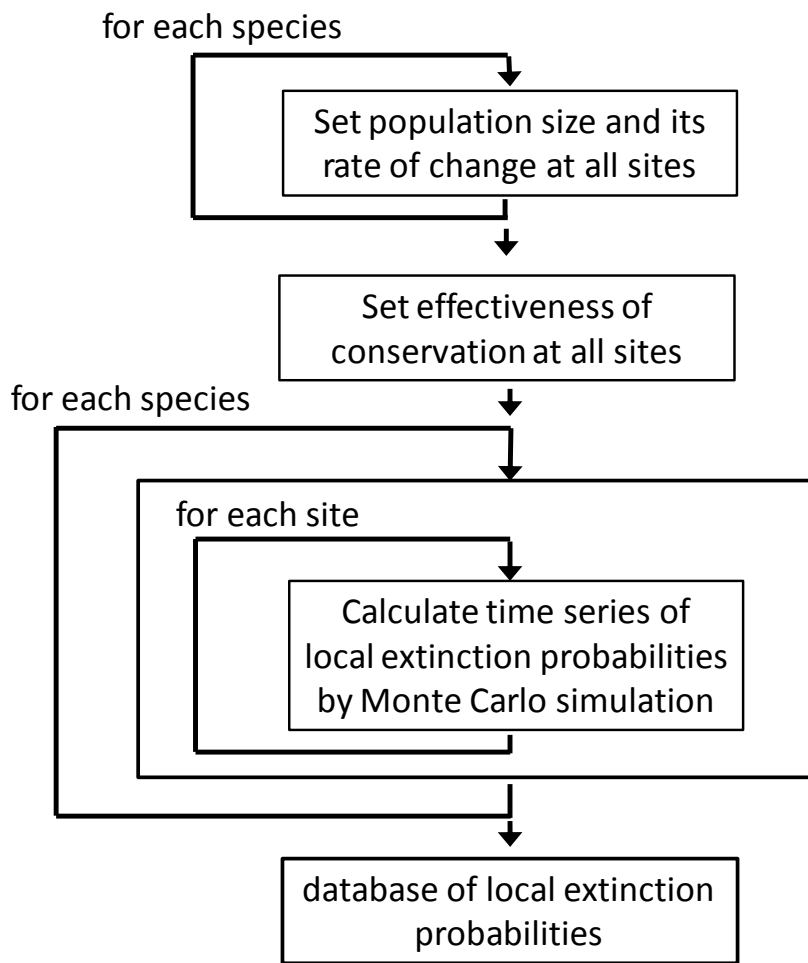

Figure S1 Preparation of database of probabilities of local extinction in SPERS.
